# Supplementary material for: Emergency nurses’ triage narrative data, their uses and structure: a scoping review protocol
Source: HighWire-hosted journal article supplement (doi:10.1136/bmjopen-2021-055132), 2022-04-01
Supplement: bmjopen-2021-055132supp004_data_supplement.pdf [file bmjopen-2021-055132supp004_data_supplement.pdf]

1 **Appendix 4. PRISMA diagram for the proposed search**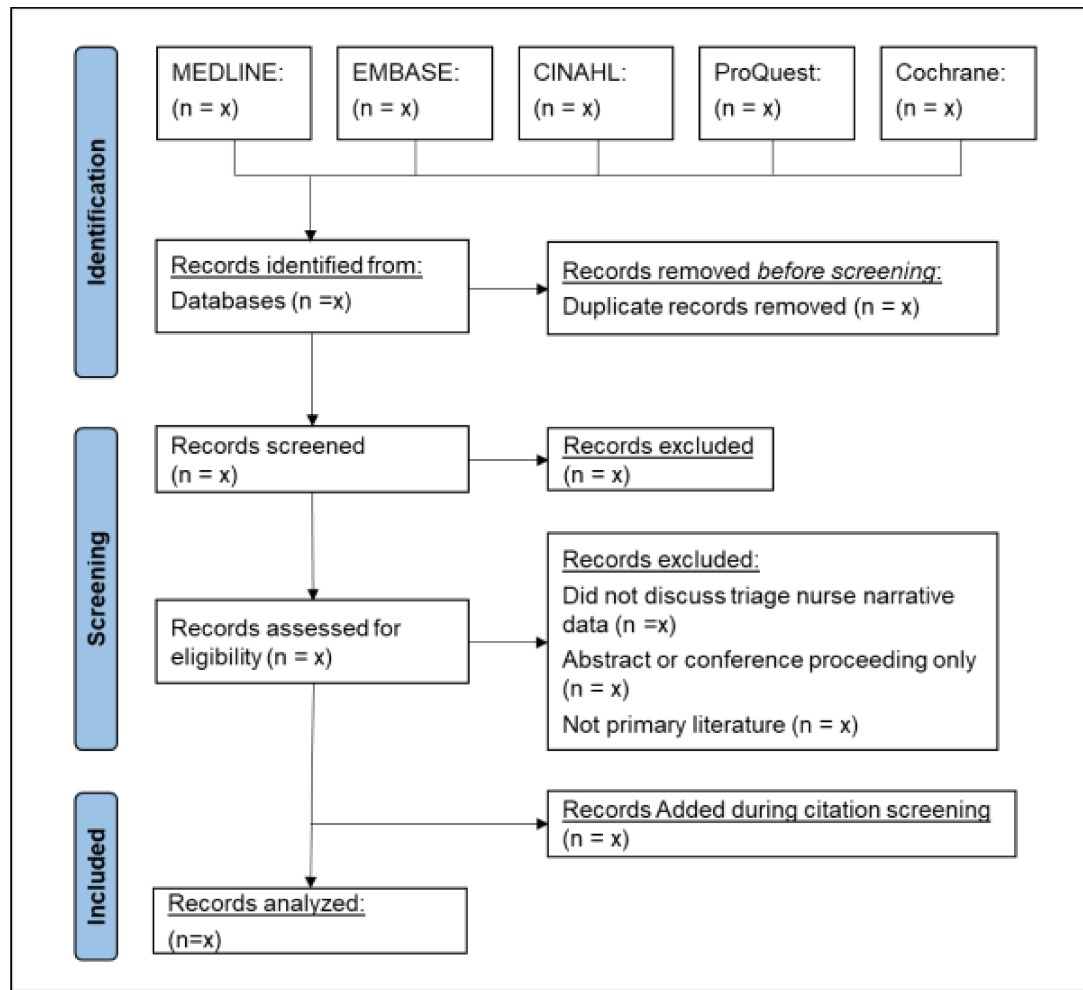

2
